# Supplementary material
Source: PubMed Central journal article supplement (PMC3442774)

## Supplementary Online Content

Zickafoose JS, Benneyworth BD, Riebschleger MP, Espinosa CM, Davis MM. Hospitalizations for intussusception before and after the reintroduction of rotavirus vaccine in the United States. *Arch Pediatr Adolesc Med*. Published online January 2, 2012. doi:10.1001/archpediatrics.2011.1501.

**eTable 1.** Estimated numbers and population-adjusted rates of hospital discharges for intussusception among infants, 1997-2009.

**eTable 2.** Estimated emergency department visits for intussusception for infants, nationwide emergency department sample, 2006-2008.

**eFigure.** Observed and predicted hospital discharges for intussusception for infants before and after vaccine re-introduction in the United States, from National Inpatient Sample, 1997-2009.

This supplementary material has been provided by the authors to give readers additional information about their work.

**eTable 1. Estimated Numbers and Population-Adjusted Rates of Hospital Discharges for Intussusception among Infants, 1997-2009**

|                               | Unweighted Hospital Discharges for Intussusception <sup>a,b</sup> | Estimated Number of Hospital Discharges for Intussusception <sup>c</sup> (95% CI) | U.S. Population Less than 1 Year of Age <sup>d</sup> | Hospital Discharges for Intussusception per 100,000 Children (95% CI) | Sensitivity Analysis: <sup>e</sup> Hospital Discharges for Intussusception per 100,000 Children (95% CI) |
|-------------------------------|-------------------------------------------------------------------|-----------------------------------------------------------------------------------|------------------------------------------------------|-----------------------------------------------------------------------|----------------------------------------------------------------------------------------------------------|
| Before vaccine                |                                                                   |                                                                                   |                                                      |                                                                       |                                                                                                          |
| 1997                          | 715                                                               | 1565 (1381-1750)                                                                  | 3,762,704                                            | 41.6 (36.7 - 46.5)                                                    | 41.6 (36.7 - 46.5)                                                                                       |
| 2000                          | 780                                                               | 1522 (1304-1739)                                                                  | 3,976,976                                            | 38.3 (32.8 - 43.7)                                                    | 38.3 (32.8 - 43.7)                                                                                       |
| 2003                          | 910                                                               | 1561 (1338-1784)                                                                  | 4,074,571                                            | 38.3 (32.8 - 43.8)                                                    | 38.3 (32.8 - 43.8)                                                                                       |
| 2006                          | 927                                                               | 1548 (1345-1751)                                                                  | 4,245,747                                            | 36.5 (31.7 - 41.2)                                                    | --                                                                                                       |
| After vaccine                 |                                                                   |                                                                                   |                                                      |                                                                       |                                                                                                          |
| 2009 (predicted) <sup>f</sup> | --                                                                | 1544 (1295-1792)                                                                  | --                                                   | 36.0 (30.2 - 41.8)                                                    | 35.9 (25.0 - 46.7)                                                                                       |
| 2009 (observed)               | 959                                                               | 1428 (1244-1612)                                                                  | 4,285,311                                            | 33.3 (29.0 - 37.6)                                                    | 33.3 (29.0 - 37.6)                                                                                       |

<sup>a</sup> From the Kids' Inpatient Database (KID), Healthcare Cost and Utilization Project (HCUP), Agency for Healthcare Research and Quality

<sup>b</sup> Unweighted hospital discharges are not comparable across years due to changes in the sampling frame of KID.

<sup>c</sup> Estimated using sampling weights supplied by HCUP to allow for valid comparisons across years.

<sup>d</sup> Resident Population Estimates. U.S. Census Bureau, Population Division; 2011. <http://www.census.gov/popest/estimates.html>.

<sup>e</sup> Results from a sensitivity analysis excluding 2006 data to account for some children receiving rotavirus vaccine.

<sup>f</sup> Prediction based on analysis of 1997 to 2006 data using variance-weighted regression and then US population less than 1 year to calculate rate of discharge

**eTable 2. Estimated Emergency Department Visits for Intussusception for Infants, Nationwide Emergency Department Sample, 2006-2008**

|                               | 2006              | 2007               | 2008              |
|-------------------------------|-------------------|--------------------|-------------------|
| ED visits for intussusception |                   |                    |                   |
| Admitted                      | 1069 (853 - 1285) | 1225 (1034 - 1416) | 1178 (973 - 1383) |
| Released                      | 563 (436 - 690)   | 774 (566 - 982)    | 589 (443 - 735)   |
| % released from ED            | 34.5              | 39.3               | 33.3              |

**eFigure. Observed and Predicted Hospital Discharges for Intussusception for Infants Before and After Vaccine Re-introduction in the United States, from National Inpatient Sample, 1997-2009.**

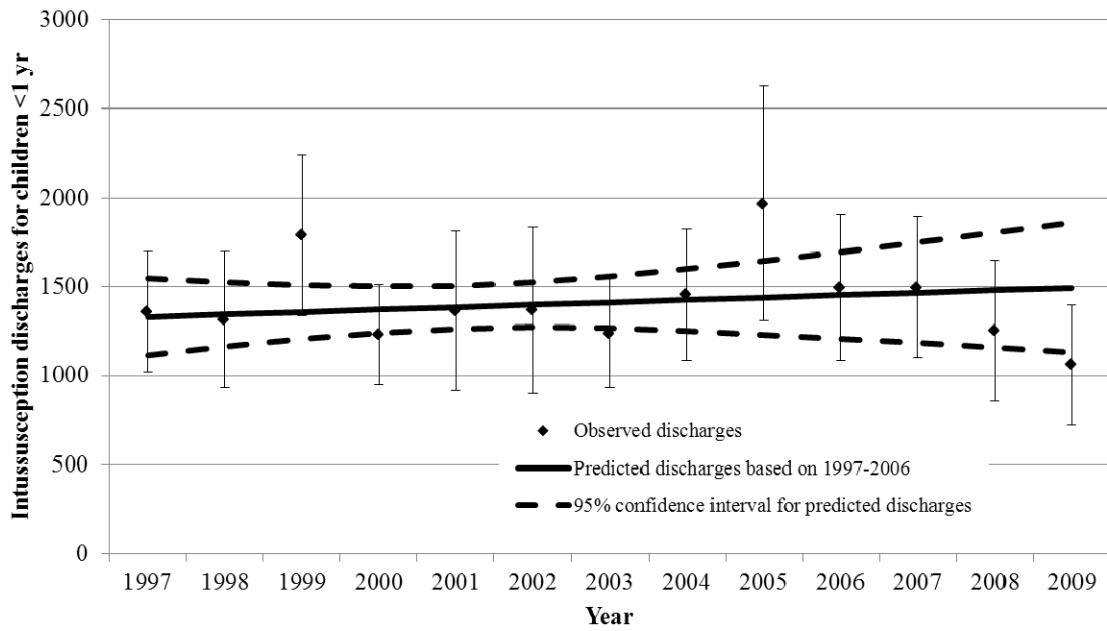

Supplement: NIHMS401359-supplement-supplement_1.pdf [file NIHMS401359-supplement-supplement_1.pdf]
